# Supplementary material for: Facile in situ growth of ZnO nanosheets standing on Ni foam as binder-free anodes for lithium ion batteries
Source: Royal Society of Chemistry journal article supplement (doi:10.1039/c9ra03373d), 2019-01-01
Supplement: c9ra03373d1.pdf [file c9ra03373d1.pdf]

## Supporting Information

Facile in situ growth of ZnO nanosheets standing on Ni foam as binder-free anodes for lithium ion batteries

Tianlai Xia<sup>a,c</sup>, Yingqian Wang<sup>a,c</sup>, Chengkang Mai<sup>a,c</sup>, Guangxing Pan<sup>a,c</sup>, Ling Zhang<sup>\*b</sup>,  
Weiwei Zhao<sup>a,c</sup>, and Jiaheng Zhang<sup>\*a,c,d</sup>

- a. State Key Laboratory of Advanced Welding and Joining, Harbin Institute of Technology, Shenzhen, 518055, China
- b. School of Science, Harbin Institute of Technology (HIT), Shenzhen, HIT Campus of University Town of Shenzhen, Shenzhen, 518055, China.
- c. Research Centre of Flexible Printed Electronic Technology, Harbin Institute of Technology, Shenzhen, 518055, China
- d. Zhuhai Institute of Advanced Technology Chinese Academy of Sciences, Zhuhai, 519000, China

**\* Corresponding author:**

E-mail address: jiahengzhang@hit.edu.cn (Jiaheng Zhang);  
zhangling2018@hit.edu.cn (Ling Zhang).

### Experimental

1. Measure the weight of NiO formed on Ni foam.

For the control experimental details of Ni foam, 480 mg (8 mmol)  $\text{CO}(\text{NH}_2)_2$ , and 222 mg (6 mmol)  $\text{NH}_4\text{F}$  were dissolved in 30 mL deionized water and 5 mL  $(\text{CH}_2\text{OH})_2$  to obtain a homogeneous solution. The pre-treated Ni foam disks were placed in the solutions in Teflon-lined stainless-steel autoclaves. After 10 h at 120 °C, the samples were allowed to cool down to room temperature naturally and washed with deionized water, dried thoroughly, and annealed under air at 450 °C for 3 h at a

heating rate of  $1.5\text{ }^{\circ}\text{C min}^{-1}$ . And the mass of Ni foam after hydrothermal and calcination treatments are 0.3 mg more than those without the two treatments.

## 2. Samples for ex-situ SEM, XPS, and XRD characterizations.

For ex-situ SEM characterizations during the discharge and charge process, three cells for every process (total 24 cells) were used to investigate the changes in morphology and composites for every potential (pristine, discharge to 1.5, 0.6, 0.01 V, and charge to 0.2, 1.1, 2.0, 3.0 V). For example, for the cell discharged to 0.01 V, the cell was discharged to 1.5, 0.6, and 0.01 V finally. For the cell charged to 0.2 V in Fig. 6e, the cell was discharged to 1.5, 0.6, 0.01 V, and then charged to 0.2 V finally.

After the discharging or charging processes, the electrode disc was taken out from cell, and washed by solvent Diethyl carbonate (DEC) twice to get rid of the electrolyte, and then put in the vacuum at  $60\text{ }^{\circ}\text{C}$  to evaporate DEC and conduct the SEM, XPS and XRD characterizations.

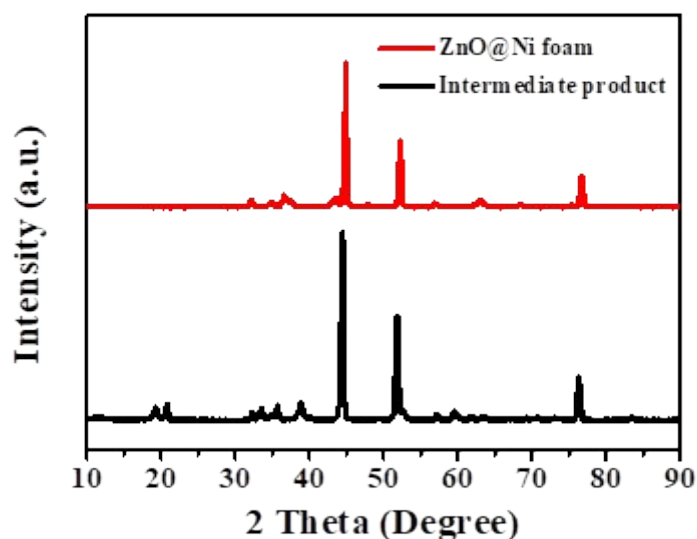

**Fig. S1** XRD patterns of the standing nanosheet intermediates in situ grown on Ni foam before calcinations at  $450\text{ }^{\circ}\text{C}$  compared with the ZnO nanosheets on Ni foam after calcinations.

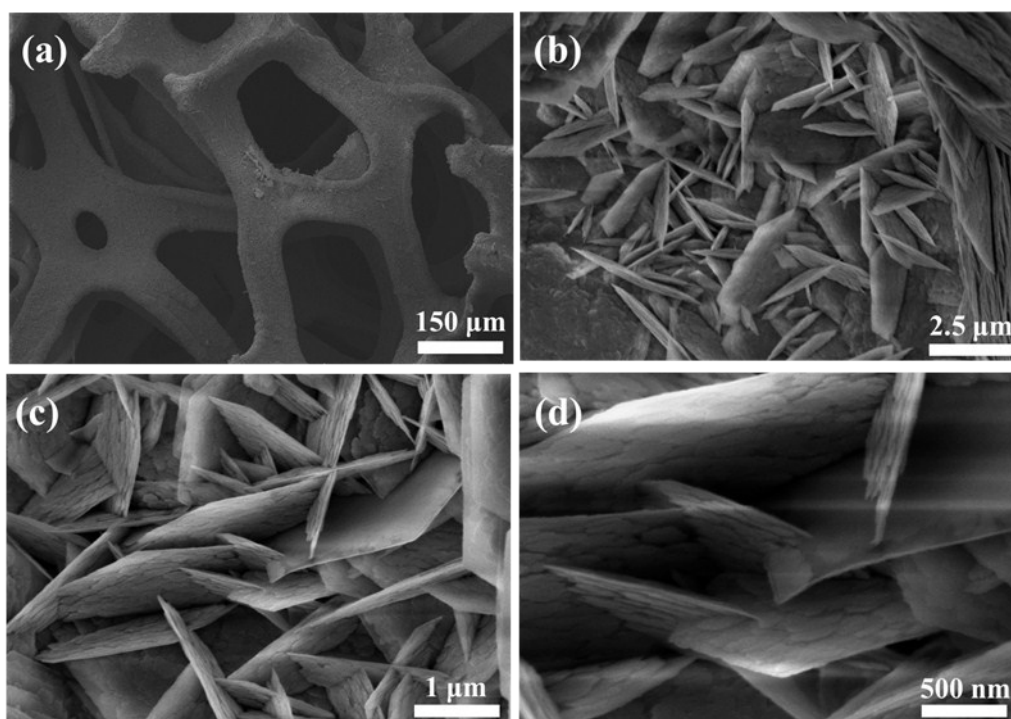

**Fig. S2** SEM images of the standing nanosheet intermediates in situ grown on Ni foam before calcinations at 450 °C.

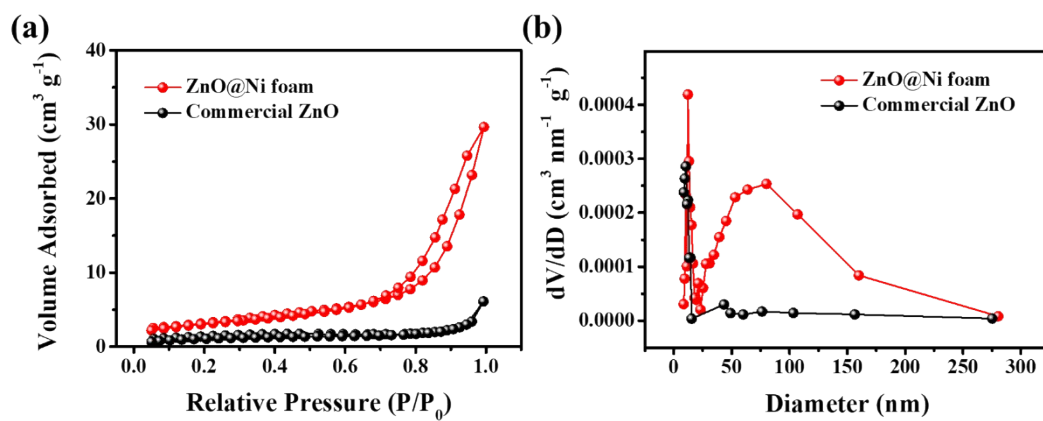

**Fig. S3** N<sub>2</sub> adsorption–desorption isotherms (a) and Barrett-Joyner-Halenda pore-size distribution curves (b) of ZnO nanosheets@Ni foam and commercial ZnO powders.

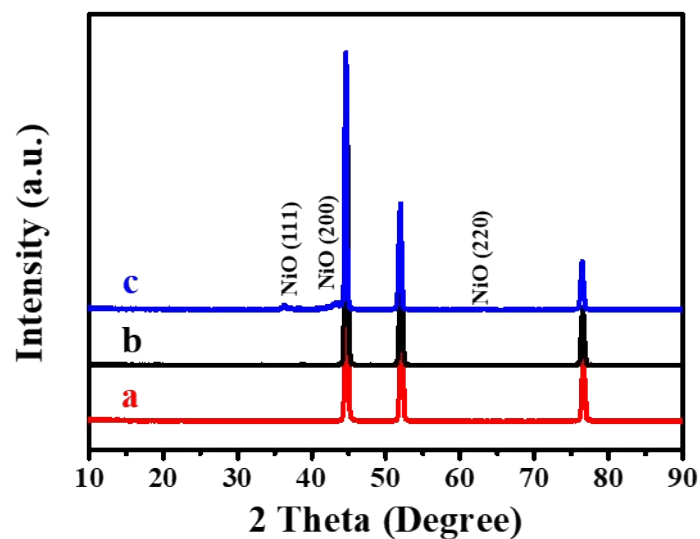

Fig. S4 XRD patterns of Ni foam before treatment (a), after hydrothermal treatment (b), and after hydrothermal and calcination treatments (c).

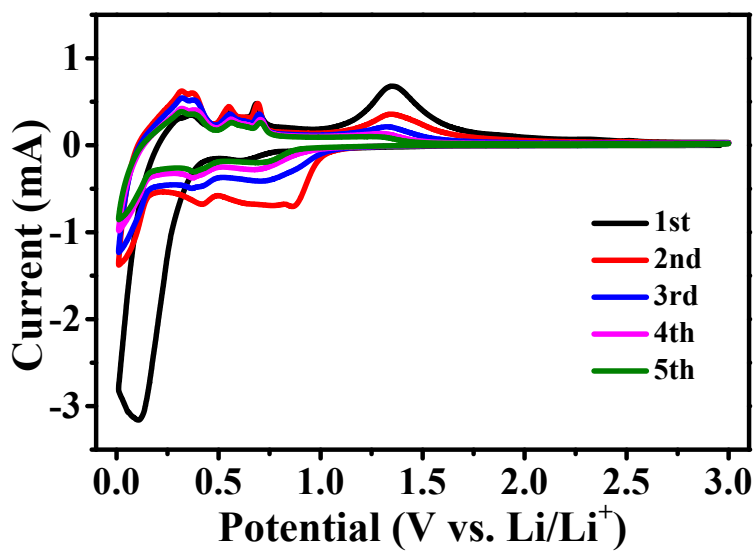

Fig. S5 CVs of commercial ZnO powders on Cu foil at 0.1 mV s<sup>-1</sup>.

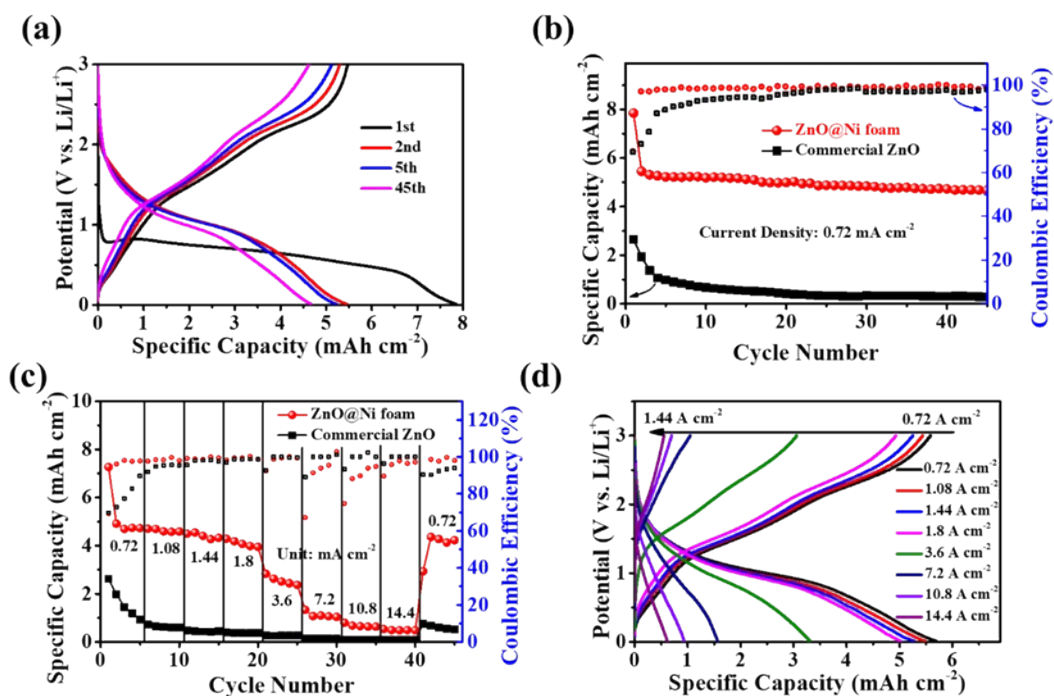

**Fig. S6** (a) Galvanostatic charge–discharge curves at  $0.72 \text{ mA cm}^{-2}$  of ZnO nanosheets@Ni foam at different cycles; (b) Cycling performance at  $0.72 \text{ mA cm}^{-2}$  and (c) rate performance at various current densities of ZnO nanosheets@Ni foam and commercial ZnO@Cu foil; (d) Galvanostatic charge–discharge curves at various current density.

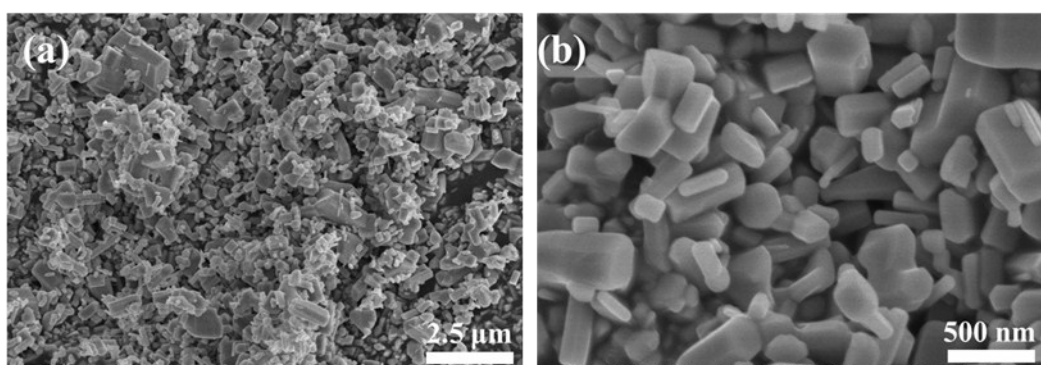

**Fig. S7** SEM images of the commercial ZnO particles.
